# Supplementary material for: Dynamic isomers engaged fabrication of copper sulfide rattle-type structures and their optoelectronic properties
Source: Royal Society of Chemistry journal article supplement (doi:10.1039/c1ce05588g), 2011-01-01
Supplement: c1ce05588g.pdf [file c1ce05588g.pdf]

**Supplementary Material For**  
**Dynamic isomers engaged fabrication of copper sulfide rattle-type structures and**  
**their optoelectronic properties**

**Zhen Fang, <sup>\*a</sup> Yufeng Liu,<sup>a</sup> Qin Wang,<sup>a</sup> Yueting Fan,<sup>a</sup> Xiaowang Liu<sup>a</sup> and**  
**Weizhi Wang<sup>a</sup>**

<sup>a</sup> Anhui Key Laboratory of Functional Molecular Solids, College of Chemistry and Materials Science, Anhui Normal University, Wuhu, 241000, P. R. China. E-mail: fzfsn@mail.ahnu.edu.cn; Fax: +86-553-3869302; Tel: +86-553-3937135.

**1. XPS results**

The XPS survey spectrum in **Fig. S1** reveals that the obtained sample consists of Cu and S. The binding energies of all spectra were corrected by referencing the C1s value of 284.6 eV. The high-resolution XPS spectra of Cu 2p and S 2p region are shown in figure 1b and 1c. The spectrum of the Cu 2p signal reveals that the binding energy of Cu 2p<sub>3/2</sub> and Cu 2p<sub>1/2</sub> is 932.5 eV and 952.2 eV. The sulfur 2p peaks are located at 162.7 eV, which are consistent with the 160-164 eV range expected for S in sulfide phase.<sup>1</sup>

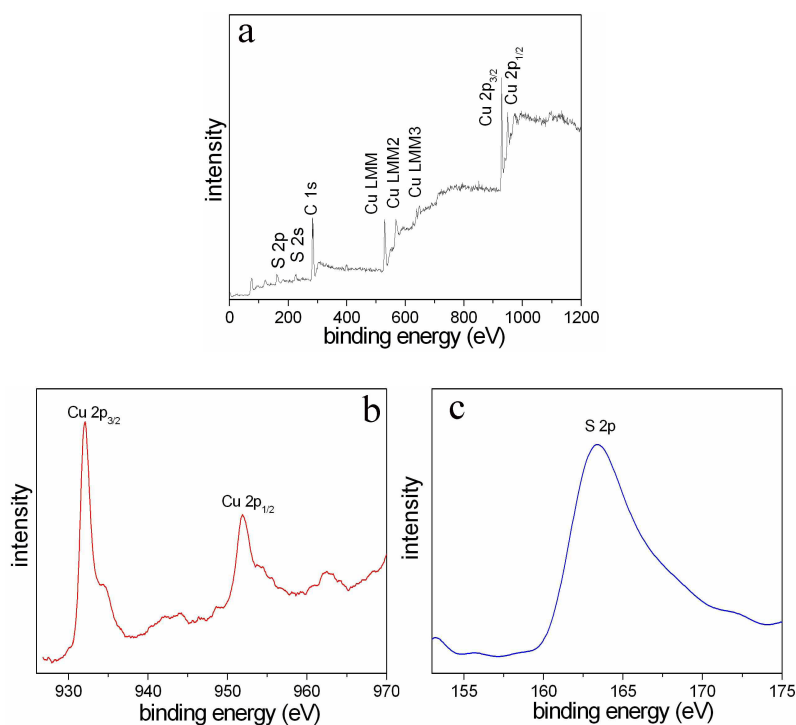

**Fig. S1** (a) XPS survey spectrum; (b) and (c) high-resolution XPS spectra of Cu 2p and S 2s.

## 2. Size distribution

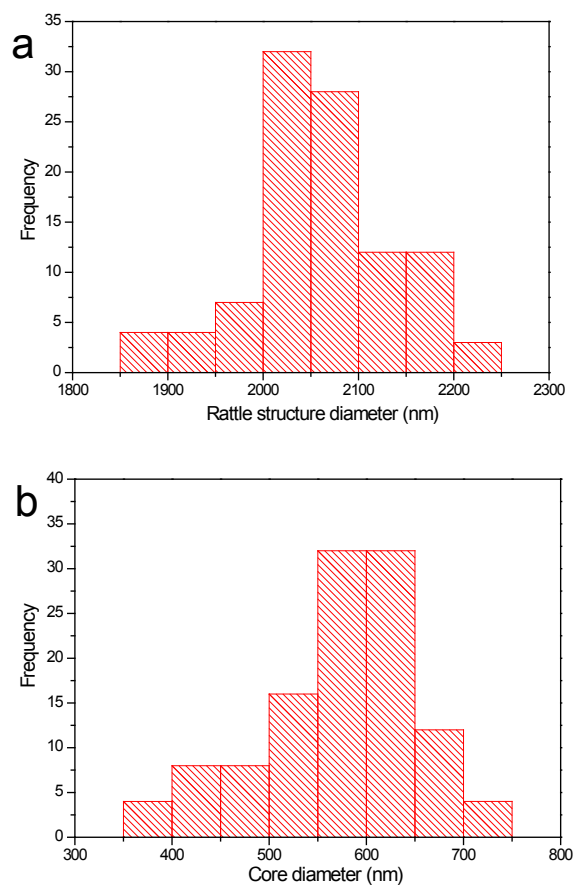

**Fig. S2** Size distribution of (a) the rattle type structure and (b) the core.

## 3. The reaction between the centrifugated solution and $\text{Fe}^{3+}$

The centrifugated solution obtained at 6 hours turn into red for the formation of  $[\text{Fe}(\text{SCN})_x]^{3-x}$  When  $\text{Fe}^{3+}$  was added into it

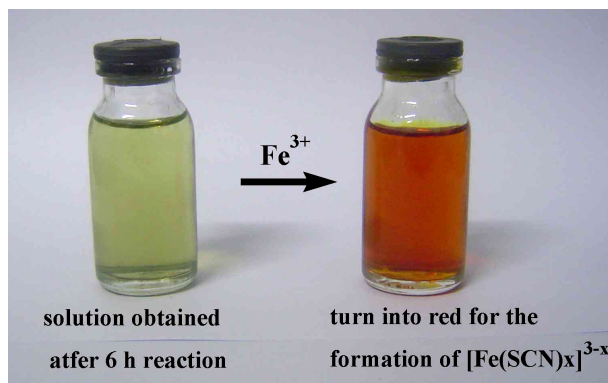

**Fig. S3** Digital photo of the solution before and after  $\text{Fe}^{3+}$  added.

## 4. The effect of anions

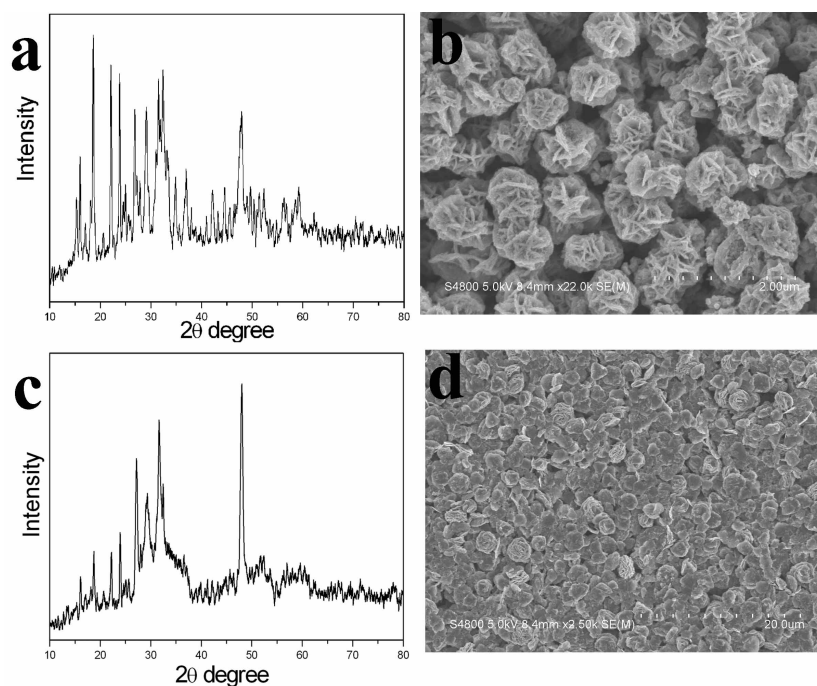

**Fig. S4** XRD pattern and SEM image of intermediate obtained at 4 h with (a and b)  $\text{CuSO}_4$ , (c and d)  $\text{CuCl}_2 \cdot 2\text{H}_2\text{O}$ .

### 5. SEM evolution process

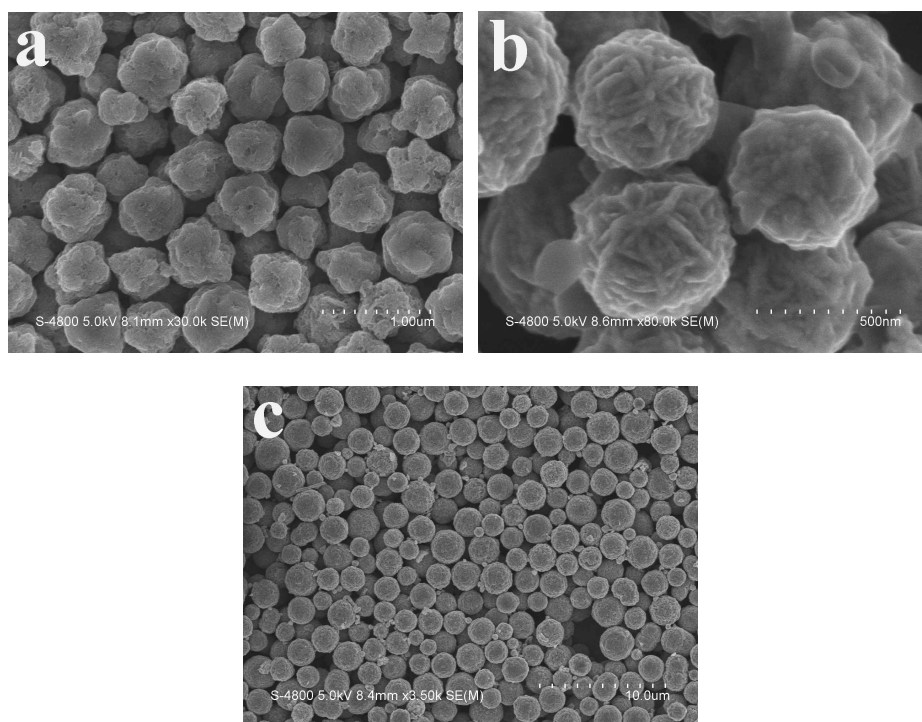

**Fig. S5** SEM image of the evolution process of  $\text{Cu}_{1.8}\text{S}$  RTS after (a) 1 h, (b) 6 h and (c) 1 day reaction.

## 6. Optoelectronic device

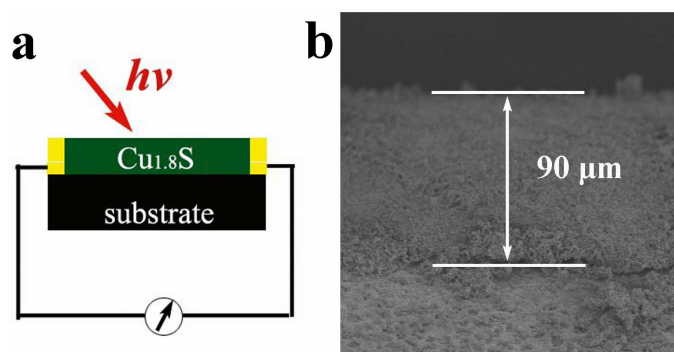

**Fig. S6** (a) sketch map of setting for photocurrent measurement; (b) SEM image of the prepared  $\text{Cu}_{1.8}\text{S}$  film.

## References

1. Y. F. Liu, J. B. Cao, Y. Y. Wang, J. H. Zeng and Y. T. Qian. *Inorg. Chem. Commun.* 2002, **5**, 407–410.
